# Supplementary material for: Costs of mass drug administration for scabies in Fiji
Source: PubMed Central journal article supplement (PMC8846527; doi:10.1371/journal.pntd.0010147), 2022-02-03
Supplement: pntd.0010147.s003.pdf [file pntd.0010147.s003.pdf]

**S3 Table. Financial and economic costs**

| <b>Input cost component</b>         | <b>Included in financial costs</b> | <b>Included in economic costs</b> |
|-------------------------------------|------------------------------------|-----------------------------------|
| Fuel                                | Yes                                | Yes                               |
| Office supplies                     | Yes                                | Yes                               |
| Office utilities                    | Yes                                | Yes                               |
| Communications                      | Yes                                | Yes                               |
| Per diems                           | Yes                                | Yes                               |
| Catering for training and meetings  | Yes                                | Yes                               |
| Print and media awareness materials | Yes                                | Yes                               |
| Vehicles (rented)                   | Yes                                | Yes                               |
| Vehicles (Ministry of Health)       | No                                 | Yes                               |
| Ministry of Health staff time       | No                                 | Yes                               |
| Community Health Worker (CHW) time  | No                                 | Yes                               |
| Permethrin                          | Yes                                | Yes                               |
| Ivermectin                          | Yes                                | Yes                               |
| Ministry of Health office space     | No                                 | Yes                               |
